# Supplementary material
Source: publisher figshare collection journal article supplement (https://acs.figshare.com/ndownloader/files/4038109)
Supplement: Supplementary file 1 [file 4038109]

 
data_q59d 
  
_audit_creation_method            SHELXTL 
_chemical_name_systematic 
; 
 ? 
; 
_chemical_name_common             ? 
_chemical_melting_point           ? 
_chemical_formula_moiety          ? 
_chemical_formula_sum 
 'C16 H22 Cl N O4' 
_chemical_formula_weight          327.80 
  
loop_ 
 _atom_type_symbol 
 _atom_type_description 
 _atom_type_scat_dispersion_real 
 _atom_type_scat_dispersion_imag 
 _atom_type_scat_source 
 'C'  'C'   0.0181   0.0091 
 'International Tables Vol C Tables 4.2.6.8 and 6.1.1.4' 
 'H'  'H'   0.0000   0.0000 
 'International Tables Vol C Tables 4.2.6.8 and 6.1.1.4' 
 'N'  'N'   0.0311   0.0180 
 'International Tables Vol C Tables 4.2.6.8 and 6.1.1.4' 
 'O'  'O'   0.0492   0.0322 
 'International Tables Vol C Tables 4.2.6.8 and 6.1.1.4' 
 'Cl'  'Cl'   0.3639   0.7018 
 'International Tables Vol C Tables 4.2.6.8 and 6.1.1.4' 
  
_symmetry_cell_setting            Triclinic 
_symmetry_space_group_name_H-M    P-1 
  
loop_ 
 _symmetry_equiv_pos_as_xyz 
 'x, y, z' 
 '-x, -y, -z' 
  
_cell_length_a                    6.0662(2) 
_cell_length_b                    8.1707(2) 
_cell_length_c                    16.8920(5) 
_cell_angle_alpha                 103.880(2) 
_cell_angle_beta                  92.202(2) 
_cell_angle_gamma                 95.783(2) 
_cell_volume                      806.97(4) 
_cell_formula_units_Z             2 
_cell_measurement_temperature     100(2) 
_cell_measurement_reflns_used     4936 
_cell_measurement_theta_min       5.41 
_cell_measurement_theta_max       69.70 
  
_exptl_crystal_description        Thin 
_exptl_crystal_colour             colourless 
_exptl_crystal_size_max           0.90 
_exptl_crystal_size_mid           0.06 
_exptl_crystal_size_min           0.02 
_exptl_crystal_density_meas       ? 
_exptl_crystal_density_diffrn     1.349 
_exptl_crystal_density_method     'not measured' 
_exptl_crystal_F_000              348 
_exptl_absorpt_coefficient_mu     2.251 
_exptl_absorpt_correction_type    multi-scan 
_exptl_absorpt_correction_T_min   0.863 
_exptl_absorpt_correction_T_max   1.000 
_exptl_absorpt_process_details    ? 
  
_exptl_special_details 
; 
 ? 
; 
  
_diffrn_ambient_temperature       100(2) 
_diffrn_radiation_wavelength      1.54178 
_diffrn_radiation_type            CuK\a 
_diffrn_radiation_source          'Bruker MicroStar microfocus rotating anode' 
_diffrn_radiation_monochromator   'Helios multilayer optics' 
_diffrn_measurement_device_type   'Bruker APEX-II CCD' 
_diffrn_measurement_method        '\f and \w scans' 
_diffrn_detector_area_resol_mean  ? 
_diffrn_reflns_number             8871 
_diffrn_reflns_av_R_equivalents   0.0182 
_diffrn_reflns_av_sigmaI/netI     0.0195 
_diffrn_reflns_limit_h_min        -7 
_diffrn_reflns_limit_h_max        7 
_diffrn_reflns_limit_k_min        -9 
_diffrn_reflns_limit_k_max        9 
_diffrn_reflns_limit_l_min        -20 
_diffrn_reflns_limit_l_max        15 
_diffrn_reflns_theta_min          2.70 
_diffrn_reflns_theta_max          69.69 
_reflns_number_total              2813 
_reflns_number_gt                 2592 
_reflns_threshold_expression      >2sigma(I) 
  
_computing_data_collection        'Bruker APEX2' 
_computing_cell_refinement        'Bruker SAINT' 
_computing_data_reduction         'Bruker SAINT' 
_computing_structure_solution     'Bruker SHELXTL' 
_computing_structure_refinement   'Bruker SHELXTL' 
_computing_molecular_graphics     'Bruker SHELXTL' 
_computing_publication_material   'Bruker SHELXTL' 
  
_refine_special_details 
; 
 Refinement of F^2^ against ALL reflections.  The weighted R-factor wR and 
 goodness of fit S are based on F^2^, conventional R-factors R are based 
 on F, with F set to zero for negative F^2^. The threshold expression of 
 F^2^ > 2sigma(F^2^) is used only for calculating R-factors(gt) etc. and is 
 not relevant to the choice of reflections for refinement.  R-factors based 
 on F^2^ are statistically about twice as large as those based on F, and R- 
 factors based on ALL data will be even larger. 
; 
  
_refine_ls_structure_factor_coef  Fsqd 
_refine_ls_matrix_type            full 
_refine_ls_weighting_scheme       calc 
_refine_ls_weighting_details 
 'calc w=1/[\s^2^(Fo^2^)+(0.0547P)^2^+0.3043P] where P=(Fo^2^+2Fc^2^)/3' 
_atom_sites_solution_primary      direct 
_atom_sites_solution_secondary    difmap 
_atom_sites_solution_hydrogens    difmap 
_refine_ls_hydrogen_treatment     mixed 
_refine_ls_extinction_method      none 
_refine_ls_extinction_coef        ? 
_refine_ls_number_reflns          2813 
_refine_ls_number_parameters      279 
_refine_ls_number_restraints      0 
_refine_ls_R_factor_all           0.0372 
_refine_ls_R_factor_gt            0.0341 
_refine_ls_wR_factor_ref          0.0914 
_refine_ls_wR_factor_gt           0.0890 
_refine_ls_goodness_of_fit_ref    1.041 
_refine_ls_restrained_S_all       1.041 
_refine_ls_shift/su_max           0.000 
_refine_ls_shift/su_mean          0.000 
  
loop_ 
 _atom_site_label 
 _atom_site_type_symbol 
 _atom_site_fract_x 
 _atom_site_fract_y 
 _atom_site_fract_z 
 _atom_site_U_iso_or_equiv 
 _atom_site_adp_type 
 _atom_site_occupancy 
 _atom_site_symmetry_multiplicity 
 _atom_site_calc_flag 
 _atom_site_refinement_flags 
 _atom_site_disorder_assembly 
 _atom_site_disorder_group 
O1 O -0.00099(17) 0.39338(13) 0.36136(6) 0.0243(2) Uani 1 1 d . . . 
O2 O -0.03745(17) 0.17427(14) 0.19855(6) 0.0252(3) Uani 1 1 d . . . 
O3 O -0.3688(2) 0.0670(2) 0.13449(8) 0.0516(4) Uani 1 1 d . . . 
O4 O 0.1034(2) 0.32630(18) -0.14749(7) 0.0383(3) Uani 1 1 d . . . 
N1 N 0.1896(2) 0.80094(16) 0.40944(8) 0.0195(3) Uani 1 1 d . . . 
H1N1 H 0.092(4) 0.861(3) 0.4251(13) 0.033(5) Uiso 1 1 d . . . 
H1N2 H 0.321(3) 0.867(3) 0.4239(12) 0.032(5) Uiso 1 1 d . . . 
C1 C -0.1132(3) 0.1207(2) 0.26963(10) 0.0249(3) Uani 1 1 d . . . 
H1A H -0.265(3) 0.148(2) 0.2778(11) 0.027(5) Uiso 1 1 d . . . 
H1B H -0.108(3) -0.002(3) 0.2616(11) 0.028(5) Uiso 1 1 d . . . 
C2 C 0.0342(2) 0.21585(19) 0.34321(9) 0.0224(3) Uani 1 1 d . . . 
H2 H -0.020(3) 0.170(2) 0.3873(12) 0.026(4) Uiso 1 1 d . . . 
C3 C 0.2840(3) 0.21197(19) 0.33776(10) 0.0236(3) Uani 1 1 d . . . 
H3A H 0.325(3) 0.210(2) 0.2823(11) 0.019(4) Uiso 1 1 d . . . 
H3B H 0.334(3) 0.114(3) 0.3538(12) 0.034(5) Uiso 1 1 d . . . 
C4 C 0.3719(3) 0.3796(2) 0.39703(10) 0.0245(3) Uani 1 1 d . . . 
H4A H 0.349(3) 0.368(2) 0.4535(12) 0.024(4) Uiso 1 1 d . . . 
H4B H 0.519(3) 0.418(2) 0.3895(11) 0.028(5) Uiso 1 1 d . . . 
C5 C 0.2092(2) 0.49749(19) 0.37796(9) 0.0215(3) Uani 1 1 d . . . 
C6 C 0.2692(3) 0.5713(2) 0.30515(10) 0.0266(3) Uani 1 1 d . . . 
H6A H 0.213(3) 0.492(3) 0.2535(13) 0.033(5) Uiso 1 1 d . . . 
H6B H 0.434(3) 0.602(3) 0.3077(12) 0.032(5) Uiso 1 1 d . . . 
C7 C 0.1572(3) 0.7319(2) 0.31936(9) 0.0253(3) Uani 1 1 d . . . 
H7A H -0.007(3) 0.703(2) 0.3043(12) 0.030(5) Uiso 1 1 d . . . 
H7B H 0.217(3) 0.817(2) 0.2925(11) 0.026(4) Uiso 1 1 d . . . 
C8 C 0.1824(3) 0.6535(2) 0.44693(10) 0.0264(3) Uani 1 1 d . . . 
H8A H 0.292(3) 0.676(3) 0.4873(13) 0.033(5) Uiso 1 1 d . . . 
H8B H 0.036(4) 0.641(3) 0.4700(13) 0.040(5) Uiso 1 1 d . . . 
C9 C -0.1846(3) 0.1365(2) 0.13370(10) 0.0299(4) Uani 1 1 d . . . 
C10 C -0.0956(3) 0.1904(2) 0.06218(10) 0.0281(4) Uani 1 1 d . . . 
C11 C -0.2352(3) 0.1589(2) -0.00888(11) 0.0351(4) Uani 1 1 d . . . 
H11 H -0.382(4) 0.106(3) -0.0084(14) 0.046(6) Uiso 1 1 d . . . 
C12 C -0.1632(3) 0.2038(2) -0.07745(11) 0.0352(4) Uani 1 1 d . . . 
H12 H -0.257(4) 0.177(3) -0.1276(14) 0.040(5) Uiso 1 1 d . . . 
C13 C 0.0505(3) 0.2840(2) -0.07683(10) 0.0302(4) Uani 1 1 d . . . 
C14 C 0.1926(3) 0.3146(2) -0.00692(10) 0.0312(4) Uani 1 1 d . . . 
H14 H 0.333(4) 0.364(3) -0.0060(13) 0.041(6) Uiso 1 1 d . . . 
C15 C 0.1193(3) 0.2665(2) 0.06170(10) 0.0294(4) Uani 1 1 d . . . 
H15 H 0.216(3) 0.290(3) 0.1101(13) 0.033(5) Uiso 1 1 d . . . 
C16 C 0.3165(3) 0.4143(3) -0.14958(12) 0.0474(5) Uani 1 1 d . . . 
H16A H 0.4308 0.3396 -0.1452 0.056(7) Uiso 1 1 calc R . . 
H16B H 0.3397 0.5151 -0.1038 0.055(7) Uiso 1 1 calc R . . 
H16C H 0.3262 0.4487 -0.2012 0.056(7) Uiso 1 1 calc R . . 
Cl Cl -0.29202(5) 0.89240(5) 0.42847(2) 0.02848(14) Uani 1 1 d . . . 
  
loop_ 
 _atom_site_aniso_label 
 _atom_site_aniso_U_11 
 _atom_site_aniso_U_22 
 _atom_site_aniso_U_33 
 _atom_site_aniso_U_23 
 _atom_site_aniso_U_13 
 _atom_site_aniso_U_12 
O1 0.0214(5) 0.0208(5) 0.0289(6) 0.0026(4) 0.0008(4) 0.0017(4) 
O2 0.0200(5) 0.0320(6) 0.0211(6) 0.0046(4) -0.0012(4) -0.0027(4) 
O3 0.0289(7) 0.0860(12) 0.0350(7) 0.0183(7) -0.0081(5) -0.0214(7) 
O4 0.0355(7) 0.0541(8) 0.0235(6) 0.0097(5) -0.0021(5) -0.0026(6) 
N1 0.0183(6) 0.0181(6) 0.0210(6) 0.0030(5) 0.0019(5) 0.0009(5) 
C1 0.0217(7) 0.0259(8) 0.0248(8) 0.0045(6) 0.0028(6) -0.0040(6) 
C2 0.0244(7) 0.0193(8) 0.0230(8) 0.0057(6) 0.0027(6) -0.0015(6) 
C3 0.0243(7) 0.0202(8) 0.0263(8) 0.0062(6) -0.0010(6) 0.0027(6) 
C4 0.0220(8) 0.0250(8) 0.0252(8) 0.0060(6) -0.0016(6) -0.0014(6) 
C5 0.0245(7) 0.0200(7) 0.0189(7) 0.0038(6) 0.0025(6) -0.0011(6) 
C6 0.0361(9) 0.0239(8) 0.0202(8) 0.0058(6) 0.0059(6) 0.0026(7) 
C7 0.0331(8) 0.0244(8) 0.0190(8) 0.0069(6) 0.0005(6) 0.0021(7) 
C8 0.0380(9) 0.0208(8) 0.0206(8) 0.0059(6) 0.0052(7) 0.0012(7) 
C9 0.0222(8) 0.0367(9) 0.0266(9) 0.0021(7) -0.0043(6) -0.0008(7) 
C10 0.0245(8) 0.0315(9) 0.0253(8) 0.0030(7) -0.0040(6) 0.0005(7) 
C11 0.0260(8) 0.0444(11) 0.0321(10) 0.0092(8) -0.0072(7) -0.0052(8) 
C12 0.0311(9) 0.0444(10) 0.0270(9) 0.0071(7) -0.0112(7) -0.0017(8) 
C13 0.0325(8) 0.0342(9) 0.0219(8) 0.0033(7) -0.0015(6) 0.0042(7) 
C14 0.0239(8) 0.0388(10) 0.0266(9) 0.0025(7) -0.0019(6) -0.0027(7) 
C15 0.0261(8) 0.0361(9) 0.0217(8) 0.0014(7) -0.0056(6) 0.0005(7) 
C16 0.0350(10) 0.0780(16) 0.0308(10) 0.0178(10) 0.0050(8) 0.0021(10) 
Cl 0.01634(19) 0.0303(2) 0.0348(2) 0.00102(15) 0.00437(14) -0.00021(14) 
  
_geom_special_details 
; 
 All esds (except the esd in the dihedral angle between two l.s. planes) 
 are estimated using the full covariance matrix.  The cell esds are taken 
 into account individually in the estimation of esds in distances, angles 
 and torsion angles; correlations between esds in cell parameters are only 
 used when they are defined by crystal symmetry.  An approximate (isotropic) 
 treatment of cell esds is used for estimating esds involving l.s. planes. 
; 
  
loop_ 
 _geom_bond_atom_site_label_1 
 _geom_bond_atom_site_label_2 
 _geom_bond_distance 
 _geom_bond_site_symmetry_2 
 _geom_bond_publ_flag 
O1 C5 1.4379(18) . ? 
O1 C2 1.4485(18) . ? 
O2 C9 1.3414(19) . ? 
O2 C1 1.4484(18) . ? 
O3 C9 1.203(2) . ? 
O4 C13 1.361(2) . ? 
O4 C16 1.421(2) . ? 
N1 C8 1.487(2) . ? 
N1 C7 1.488(2) . ? 
N1 H1N1 0.82(2) . ? 
N1 H1N2 0.91(2) . ? 
C1 C2 1.503(2) . ? 
C1 H1A 0.978(19) . ? 
C1 H1B 0.98(2) . ? 
C2 C3 1.524(2) . ? 
C2 H2 0.962(19) . ? 
C3 C4 1.522(2) . ? 
C3 H3A 0.976(18) . ? 
C3 H3B 0.97(2) . ? 
C4 C5 1.524(2) . ? 
C4 H4A 0.995(19) . ? 
C4 H4B 0.94(2) . ? 
C5 C8 1.534(2) . ? 
C5 C6 1.534(2) . ? 
C6 C7 1.511(2) . ? 
C6 H6A 0.98(2) . ? 
C6 H6B 1.00(2) . ? 
C7 H7A 1.01(2) . ? 
C7 H7B 0.97(2) . ? 
C8 H8A 0.91(2) . ? 
C8 H8B 0.99(2) . ? 
C9 C10 1.484(2) . ? 
C10 C15 1.388(2) . ? 
C10 C11 1.398(2) . ? 
C11 C12 1.370(3) . ? 
C11 H11 0.95(2) . ? 
C12 C13 1.391(3) . ? 
C12 H12 0.97(2) . ? 
C13 C14 1.392(2) . ? 
C14 C15 1.385(2) . ? 
C14 H14 0.90(2) . ? 
C15 H15 0.96(2) . ? 
C16 H16A 0.9800 . ? 
C16 H16B 0.9800 . ? 
C16 H16C 0.9800 . ? 
  
loop_ 
 _geom_angle_atom_site_label_1 
 _geom_angle_atom_site_label_2 
 _geom_angle_atom_site_label_3 
 _geom_angle 
 _geom_angle_site_symmetry_1 
 _geom_angle_site_symmetry_3 
 _geom_angle_publ_flag 
C5 O1 C2 109.83(11) . . ? 
C9 O2 C1 115.21(12) . . ? 
C13 O4 C16 117.92(14) . . ? 
C8 N1 C7 107.19(12) . . ? 
C8 N1 H1N1 111.5(15) . . ? 
C7 N1 H1N1 109.4(14) . . ? 
C8 N1 H1N2 110.2(13) . . ? 
C7 N1 H1N2 111.7(12) . . ? 
H1N1 N1 H1N2 106.9(19) . . ? 
O2 C1 C2 108.87(12) . . ? 
O2 C1 H1A 108.7(11) . . ? 
C2 C1 H1A 109.1(11) . . ? 
O2 C1 H1B 109.9(11) . . ? 
C2 C1 H1B 109.9(11) . . ? 
H1A C1 H1B 110.3(16) . . ? 
O1 C2 C1 109.11(12) . . ? 
O1 C2 C3 105.88(12) . . ? 
C1 C2 C3 117.49(13) . . ? 
O1 C2 H2 107.7(11) . . ? 
C1 C2 H2 104.6(11) . . ? 
C3 C2 H2 111.7(11) . . ? 
C4 C3 C2 101.09(12) . . ? 
C4 C3 H3A 111.3(10) . . ? 
C2 C3 H3A 110.3(10) . . ? 
C4 C3 H3B 112.8(12) . . ? 
C2 C3 H3B 111.9(12) . . ? 
H3A C3 H3B 109.4(15) . . ? 
C3 C4 C5 101.80(12) . . ? 
C3 C4 H4A 108.0(11) . . ? 
C5 C4 H4A 107.4(10) . . ? 
C3 C4 H4B 113.8(12) . . ? 
C5 C4 H4B 111.6(12) . . ? 
H4A C4 H4B 113.5(15) . . ? 
O1 C5 C4 104.30(12) . . ? 
O1 C5 C8 107.82(12) . . ? 
C4 C5 C8 116.08(13) . . ? 
O1 C5 C6 110.98(12) . . ? 
C4 C5 C6 113.48(12) . . ? 
C8 C5 C6 104.18(12) . . ? 
C7 C6 C5 103.96(12) . . ? 
C7 C6 H6A 111.3(11) . . ? 
C5 C6 H6A 110.8(12) . . ? 
C7 C6 H6B 108.9(11) . . ? 
C5 C6 H6B 109.2(11) . . ? 
H6A C6 H6B 112.3(16) . . ? 
N1 C7 C6 103.12(12) . . ? 
N1 C7 H7A 108.4(11) . . ? 
C6 C7 H7A 109.9(11) . . ? 
N1 C7 H7B 109.0(11) . . ? 
C6 C7 H7B 116.3(11) . . ? 
H7A C7 H7B 109.6(15) . . ? 
N1 C8 C5 106.71(12) . . ? 
N1 C8 H8A 108.1(13) . . ? 
C5 C8 H8A 113.2(13) . . ? 
N1 C8 H8B 107.8(12) . . ? 
C5 C8 H8B 110.6(13) . . ? 
H8A C8 H8B 110.2(18) . . ? 
O3 C9 O2 122.94(16) . . ? 
O3 C9 C10 124.33(15) . . ? 
O2 C9 C10 112.73(14) . . ? 
C15 C10 C11 118.60(16) . . ? 
C15 C10 C9 123.53(14) . . ? 
C11 C10 C9 117.85(15) . . ? 
C12 C11 C10 120.95(16) . . ? 
C12 C11 H11 120.7(14) . . ? 
C10 C11 H11 118.4(14) . . ? 
C11 C12 C13 120.14(16) . . ? 
C11 C12 H12 121.0(13) . . ? 
C13 C12 H12 118.9(13) . . ? 
O4 C13 C12 115.32(15) . . ? 
O4 C13 C14 124.99(16) . . ? 
C12 C13 C14 119.69(16) . . ? 
C15 C14 C13 119.74(16) . . ? 
C15 C14 H14 119.5(14) . . ? 
C13 C14 H14 120.8(14) . . ? 
C14 C15 C10 120.85(15) . . ? 
C14 C15 H15 119.6(12) . . ? 
C10 C15 H15 119.5(12) . . ? 
O4 C16 H16A 109.5 . . ? 
O4 C16 H16B 109.5 . . ? 
H16A C16 H16B 109.5 . . ? 
O4 C16 H16C 109.5 . . ? 
H16A C16 H16C 109.5 . . ? 
H16B C16 H16C 109.5 . . ? 
  
loop_ 
 _geom_torsion_atom_site_label_1 
 _geom_torsion_atom_site_label_2 
 _geom_torsion_atom_site_label_3 
 _geom_torsion_atom_site_label_4 
 _geom_torsion 
 _geom_torsion_site_symmetry_1 
 _geom_torsion_site_symmetry_2 
 _geom_torsion_site_symmetry_3 
 _geom_torsion_site_symmetry_4 
 _geom_torsion_publ_flag 
C9 O2 C1 C2 -162.67(13) . . . . ? 
C5 O1 C2 C1 -134.93(12) . . . . ? 
C5 O1 C2 C3 -7.60(15) . . . . ? 
O2 C1 C2 O1 67.99(15) . . . . ? 
O2 C1 C2 C3 -52.46(18) . . . . ? 
O1 C2 C3 C4 30.10(15) . . . . ? 
C1 C2 C3 C4 152.22(14) . . . . ? 
C2 C3 C4 C5 -40.23(14) . . . . ? 
C2 O1 C5 C4 -18.35(14) . . . . ? 
C2 O1 C5 C8 -142.29(12) . . . . ? 
C2 O1 C5 C6 104.21(13) . . . . ? 
C3 C4 C5 O1 36.75(14) . . . . ? 
C3 C4 C5 C8 155.19(13) . . . . ? 
C3 C4 C5 C6 -84.15(15) . . . . ? 
O1 C5 C6 C7 86.44(15) . . . . ? 
C4 C5 C6 C7 -156.50(13) . . . . ? 
C8 C5 C6 C7 -29.34(16) . . . . ? 
C8 N1 C7 C6 -33.67(16) . . . . ? 
C5 C6 C7 N1 38.75(16) . . . . ? 
C7 N1 C8 C5 15.25(17) . . . . ? 
O1 C5 C8 N1 -109.01(14) . . . . ? 
C4 C5 C8 N1 134.49(14) . . . . ? 
C6 C5 C8 N1 8.96(17) . . . . ? 
C1 O2 C9 O3 1.8(2) . . . . ? 
C1 O2 C9 C10 -178.50(13) . . . . ? 
O3 C9 C10 C15 -178.30(19) . . . . ? 
O2 C9 C10 C15 2.0(2) . . . . ? 
O3 C9 C10 C11 0.2(3) . . . . ? 
O2 C9 C10 C11 -179.44(15) . . . . ? 
C15 C10 C11 C12 -0.8(3) . . . . ? 
C9 C10 C11 C12 -179.37(17) . . . . ? 
C10 C11 C12 C13 -0.9(3) . . . . ? 
C16 O4 C13 C12 177.70(17) . . . . ? 
C16 O4 C13 C14 -2.6(3) . . . . ? 
C11 C12 C13 O4 -178.65(17) . . . . ? 
C11 C12 C13 C14 1.6(3) . . . . ? 
O4 C13 C14 C15 179.60(16) . . . . ? 
C12 C13 C14 C15 -0.7(3) . . . . ? 
C13 C14 C15 C10 -1.0(3) . . . . ? 
C11 C10 C15 C14 1.7(3) . . . . ? 
C9 C10 C15 C14 -179.78(16) . . . . ? 
  
loop_ 
 _geom_hbond_atom_site_label_D 
 _geom_hbond_atom_site_label_H 
 _geom_hbond_atom_site_label_A 
 _geom_hbond_distance_DH 
 _geom_hbond_distance_HA 
 _geom_hbond_distance_DA 
 _geom_hbond_angle_DHA 
 _geom_hbond_site_symmetry_A 
N1 H1N1 Cl  0.82(2) 2.37(2) 3.0975(13) 148.7(19) . 
N1 H1N2 Cl  0.91(2) 2.33(2) 3.1439(13) 148.7(17) 1_655 
N1 H1N2 Cl  0.91(2) 2.80(2) 3.2288(13) 110.1(14) 2_576 
  
_diffrn_measured_fraction_theta_max    0.925 
_diffrn_reflns_theta_full              66.00 
_diffrn_measured_fraction_theta_full   0.96 
_refine_diff_density_max    0.301 
_refine_diff_density_min   -0.190 
_refine_diff_density_rms    0.046 
